# Supplementary material for: Structural and molecular myelination deficits occur prior to neuronal loss in the YAC128 and BACHD models of Huntington disease
Source: PubMed Central journal article supplement (PMC5181633; doi:10.1093/hmg/ddw122), 2016-04-28
Supplement: supp_ddw122_Teo_et_al_Supplementary_data.pdf [file supp_ddw122_Teo_et_al_Supplementary_data.pdf]

## Supplementary data:

Structural and molecular myelination deficits occur prior to neuronal loss in the YAC128 and BACHD models of Huntington disease

**Supplementary Table 1.** Two-way ANOVA of mean FA in regions of interest (related to Figure 1)

| Source of Variation | degree of freedom | Anterior CC  |          | Posterior CC |         | CG           |         | AC           |          | EC          |         |
|---------------------|-------------------|--------------|----------|--------------|---------|--------------|---------|--------------|----------|-------------|---------|
|                     |                   | F            | P-value  | F            | P-value | F            | P-value | F            | P-value  | F           | P-value |
| Genotype            | 1                 | <b>24.97</b> | < 0.0001 | <b>14.48</b> | 0.0003  | <b>18.45</b> | 0.0001  | <b>23.02</b> | < 0.0001 | <b>4.22</b> | 0.04    |
| Age                 | 4                 | <b>3.02</b>  | 0.02     | 1.94         | 0.11    | 1.14         | 0.34    | <b>5.95</b>  | 0.0004   | 2.37        | 0.06    |
| Interaction         | 4                 | 0.92         | 0.46     | 0.47         | 0.76    | 0.75         | 0.56    | 0.63         | 0.64     | 0.91        | 0.47    |

FA – fractional anisotropy; Dr – radial diffusivity; Dp – parallel diffusivity; AC – anterior commissure; CC – corpus callosum; CG – cingulum; EC – external capsule. Significant results highlighted in bold.
